# Exercise Training Improves Vascular Endothelial Function in Patients with Type 1 Diabetes

GABRIELE FUCHSJÄGER-MAYRL, MD<sup>1</sup>  
JOHANNES PLEINER, MD<sup>2</sup>  
GÜNTHER F. WIESINGER, MD<sup>3</sup>  
ANNA E. SIEDER, MD<sup>2</sup>  
MICHAEL QUITTAN, MD<sup>3</sup>  
MARTIN J. NUHR, MD<sup>3</sup>

CLAUDIA FRANCESCONI, MD<sup>4</sup>  
HANS-PETER SEIT, MD<sup>4</sup>  
MARIO FRANCESCONI, MD<sup>4</sup>  
LEOPOLD SCHMETTERER, PHD<sup>2,5</sup>  
MICHAEL WOLZT, MD<sup>2</sup>

**OBJECTIVE** — Impaired endothelial function of resistance and conduit arteries can be detected in patients with type 1 diabetes. We studied whether a persistent improvement of endothelial function can be achieved by regular physical training.

**RESEARCH DESIGN AND METHODS** — The study included 26 patients with type 1 diabetes of  $20 \pm 10$  years' duration and no overt angiopathy; 18 patients ( $42 \pm 10$  years old) participated in a bicycle exercise training program, and 8 patients with type 1 diabetes ( $33 \pm 11$  years old) served as control subjects. Vascular function of conduit arteries was assessed by flow-mediated and endothelium-independent dilation of the brachial artery and of resistance vessels by the response of ocular fundus pulsation amplitudes to intravenous  $N^G$ -monomethyl-L-arginine (L-NMMA) at baseline, after 2 and 4 months of training, and 8 months after cessation of regular exercise.

**RESULTS** — Training increased peak oxygen uptake ( $VO_{2max}$ ) by 13% after 2 months and by 27% after 4 months ( $P = 0.04$ ). Flow-mediated dilation (FMD) of the brachial artery increased from  $6.5 \pm 1.1$  to  $9.8 \pm 1.1\%$  ( $P = 0.04$ ) by training. L-NMMA administration decreased fundus pulsation amplitude (FPA) by  $9.1 \pm 0.9\%$  before training and by  $13.4 \pm 1.5\%$  after 4 months of training ( $P = 0.02$ ).  $VO_{2max}$ , FMD, and FPA were unchanged in the control group. Vascular effects from training were abrogated 8 months after cessation of exercise.

**CONCLUSIONS** — Our study demonstrates that aerobic exercise training can improve endothelial function in different vascular beds in patients with long-standing type 1 diabetes, who are at considerable risk for diabetic angiopathy. However, the beneficial effect on vascular function is not maintained in the absence of exercise.

*Diabetes Care* 25:1795–1801, 2002

Cardiovascular morbidity and mortality in patients with type 1 diabetes are caused by micro- and macrovascular complications, with clinical mani-

festation beginning 15–20 years after the onset of diabetes (1,2). It is generally accepted that the endothelium plays a pivotal role in the maintenance of vascular

function. Impaired endothelial function is detectable in patients with diseases associated with vascular complications, such as hypercholesterolemia (3), hypertension (4), or diabetes (5), in the absence of macroscopic changes of the vasculature. An important functional consequence of endothelial dysfunction is the inability to release nitric oxide (NO), the vasodilator of the underlying vascular smooth muscle cells.

Studies in patients with hypertension and hypercholesterolemia (6) or coronary artery disease (7) have suggested that improvement of endothelial function could be a surrogate therapeutic target for interventions to reduce the development of regular symptoms or clinical events. Lifestyle changes such as regular physical exercise may influence endothelial function and may in turn reduce the cardiovascular risk profile. It has been demonstrated that regular physical exercise can correct endothelial dysfunction in patients with chronic heart failure (8), hypercholesterolemia (9), and the polymetabolic syndrome (10). This would also represent an easy and generally applicable intervention to preserve or restore vascular function in diabetes.

The aim of the present study was to investigate whether increased physical activity could also influence vascular endothelial function in patients with long-standing type 1 diabetes, who are at considerable risk for vascular complications. Subjects participated in a standardized exercise training program over 4 months. The functional properties of conduit vessels were assessed by measurement of endothelium-dependent and -independent vasodilation of the brachial artery (11); the functional properties of the resistance vessels were assessed by the responses of systemic hemodynamics and ocular blood flow to systemic administration of  $N^G$ -monomethyl-L-arginine (L-NMMA) (12), an inhibitor of constitutive NO formation. To investigate if beneficial effects by training persist, vascular function tests were repeated 8 months after cessation of regular exercise.

From the <sup>1</sup>Department of Ophthalmology, University of Vienna, Vienna, Austria; the <sup>2</sup>Department of Clinical Pharmacology, University of Vienna, Vienna, Austria; the <sup>3</sup>Department of Physical Medicine and Rehabilitation, University of Vienna, Vienna, Austria; <sup>4</sup>Rehabilitationszentrum Alland, Alland, Austria; and the <sup>5</sup>Institute of Medical Physics, University of Vienna, Vienna, Austria.

Address correspondence and reprint requests to Dr. Michael Wolzt, Klinische Pharmakologie, Allgemeines Krankenhaus Wien, Währinger Gürtel 18-20, A-1090 Vienna, Austria. E-mail: michael.wolzt@univie.ac.at.

Received for publication 14 January 2002 and accepted in revised form 29 June 2002.

G.F.-M. and J.P. contributed equally to this study.

**Abbreviations:** FMD, flow-mediated dilation; FPA, fundus pulsation amplitude; GTN, nitroglycerin; L-NMMA,  $N^G$ -monomethyl-L-arginine; MAHC, modified Airlie House classification; MMT, manual muscle test;  $VO_{2max}$ , peak oxygen uptake.

A table elsewhere in this issue shows conventional and Système International (SI) units and conversion factors for many substances.

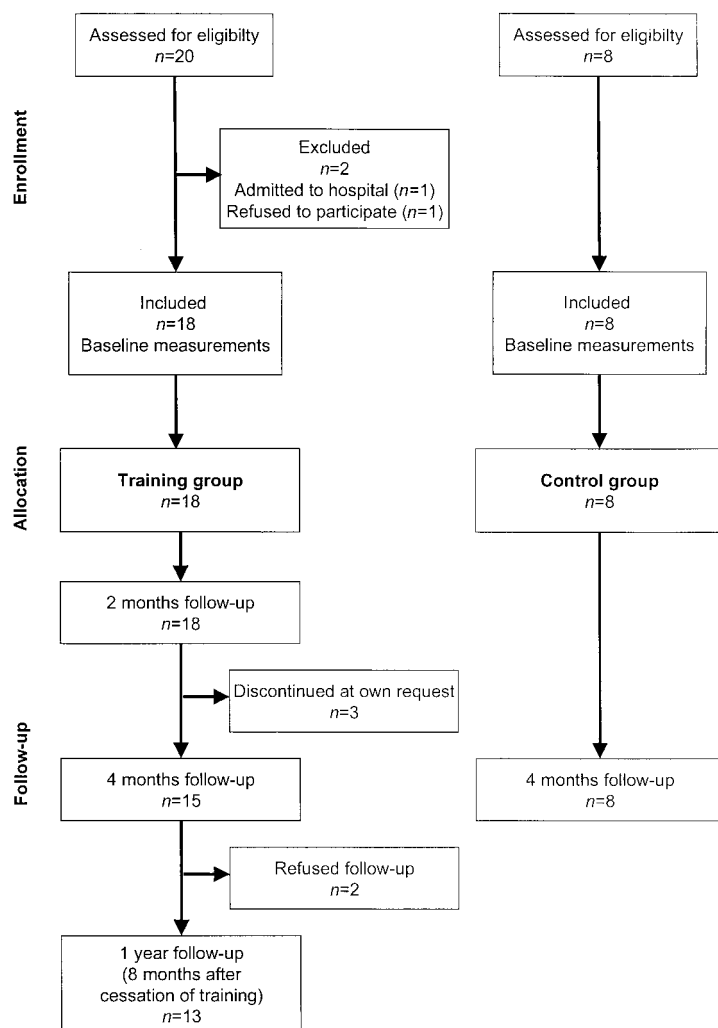

**Figure 1**—Study design and participants.

## RESEARCH DESIGN AND METHODS

The study was approved by the Ethics Committee of the University of Vienna. The investigation complies with the principles of the Declaration of Helsinki including current revisions and the Good Clinical Practice guidelines of the European Union. All subjects gave written informed consent.

### Subjects

The open parallel-group study included 26 patients aged  $40 \pm 10$  years with type 1 diabetes of  $20 \pm 10$  years' duration (Fig. 1). Eighteen patients with type 1 diabetes (11 women and 7 men aged  $42 \pm 10$  years) with a sedentary lifestyle before enrollment (physical exercise once a week) were included in the intervention group. Subsequently, eight patients with type 1 diabetes (three women and five men aged

$33 \pm 11$  years), who claimed to exercise more than once weekly and to be in a good physical condition, were recruited and served as control subjects (Fig. 1). There were 13 smokers in the training group and 5 among control subjects. Physical and metabolic patient characteristics are summarized in Tables 1 and 2.

All patients were screened for diabetic microvascular complications. Two patients (one in the treatment group and one control subject) had increased albumin excretion of 36 and 32  $\mu\text{g}/\text{min}$ , respectively. Microalbuminuria was  $<20 \mu\text{g}/\text{min}$  in all other patients. Diabetic retinopathy was classified according to the modified Airlie House classification (MAHC) (13). In the training group, 11 patients had no signs of diabetic retinopathy, 1 patient had hemorrhages and/or microaneurysms (MAHC level 2), and 6

other patients had hemorrhages and/or microaneurysms (one of them also soft exudates) (MAHC level 3). Among control subjects, seven patients were without diabetic retinopathy. One patient had hemorrhages and/or microaneurysms (MAHC level 3).

None of the subjects had uncontrolled moderate or severe systemic hypertension. Four patients had a medical history of hypertension; accordingly, two patients in the training group and two control subjects received concomitant therapy with calcium channel blockers. Hypercholesterolemia was present in four patients in the training group and two control subjects, and two patients in the training group received statin therapy. There was no evidence of autonomic cardiac neuropathy in any of the patients. Three women in the training group were postmenopausal but did not receive hormone replacement therapy. Cardiopulmonary dysfunction was excluded by transthoracic echocardiography and a lung function test (forced expiratory volume in 1 s, vital capacity) before the study.

### Assessment of outcome parameters

Outcome parameters in the intervention group were measured before training, after 2 and 4 months of the aerobic training program, and 8 months after the end of the training program. Patients in the control group were followed over 4 months to confirm the reproducibility of the measurements. Exercise and muscle strength tests were performed on different days than were vascular function tests. Plasma glucose levels in the training group before vascular function tests were  $141 \pm 16 \text{ mg/dl}$  before training,  $127 \pm 16$  and  $192 \pm 18 \text{ mg/dl}$  after 2 and 4 months, respectively, and  $113 \pm 11 \text{ mg/dl}$  at the 8-month follow-up. Plasma glucose levels in the control group were  $132 \pm 38 \text{ mg/dl}$  at baseline and  $124 \pm 20 \text{ mg/dl}$  after 4 months.

### Peak oxygen uptake and muscle strength

Exercise studies were performed using a symptom-limited, incremental cycle ergometer protocol. The work rate was increased by 25 W every 2 min. Ventilatory parameters were measured breath by breath using a computer-based device (Sensor Medics 2900 System; Sensor-medics, Yorba Linda, CA). Peak oxygen uptake ( $\text{VO}_{2\text{max}}$ ) was defined as the maximum oxygen consumption obtained during the exercise test.

**Table 1—Physical and laboratory parameters at baseline and after 2 and 4 months of training and 8 months after regular exercise training in patients with diabetes**

|                                                                 | Baseline    | Training period |              | 8 months after training |
|-----------------------------------------------------------------|-------------|-----------------|--------------|-------------------------|
|                                                                 |             | 2 months        | 4 months     |                         |
| <i>n</i>                                                        | 18          | 18              | 15           | 13                      |
| Body weight (kg)                                                | 70 ± 3      | 69 ± 3          | 68 ± 3       | 70 ± 3                  |
| BMI (kg/m <sup>2</sup> )                                        | 24.7 ± 0.9  | 24.7 ± 0.9      | 23.8 ± 0.8   | 24.4 ± 1.0              |
| Mean arterial blood pressure (mmHg)                             | 79 ± 2      | 76 ± 2          | 75 ± 2       | 79 ± 2                  |
| Resting heart rate (beats/min)                                  | 78 ± 3      | 76 ± 3          | 71 ± 3       | 80 ± 3                  |
| VO <sub>2max</sub> (ml · kg <sup>-1</sup> · min <sup>-1</sup> ) | 28.1 ± 1.2  | 31.8 ± 2.0      | 35.7 ± 2.8*  | 28.4 ± 1.8              |
| Maximum exercise capacity (W)                                   | 151 ± 12    | 165 ± 14        | 183 ± 19     | 174 ± 17                |
| Total cholesterol (mmol/l)                                      | 5.4 ± 0.3   | 5.1 ± 0.4       | 4.9 ± 0.3    | 4.9 ± 0.2               |
| LDL cholesterol (mmol/l)                                        | 3.1 ± 0.3   | 3.0 ± 0.3       | 2.8 ± 0.3    | 2.7 ± 0.2               |
| HDL cholesterol (mmol/l)                                        | 1.9 ± 0.1   | 1.7 ± 0.1       | 1.7 ± 0.1    | 1.7 ± 0.1               |
| Triglycerides (mmol/l)                                          | 1.0 ± 0.1   | 1.0 ± 0.2       | 0.8 ± 0.1    | 0.8 ± 0.1               |
| HbA <sub>1c</sub> (%)                                           | 7.3 ± 0.2   | 7.7 ± 0.3       | 7.5 ± 0.3    | 7.0 ± 0.2               |
| Insulin dose (units · kg <sup>-1</sup> · day <sup>-1</sup> )    | 0.62 ± 0.07 | —               | 0.51 ± 0.05* | 0.60 ± 0.04             |

Results are means ± SE. \**P* < 0.05 vs. baseline.

Mean manual muscle test (MMT) scores for the hip flexors and knee extensors were measured in all subjects (CY-BEX 6000 Isokinetic dynamometer; Lumex, Ronkonkoma, NY) (14). Hand-grip muscle strength of the dominant and nondominant hands was assessed using a portable device (Digital Hand dynamometer; Jamar, Clifton, NJ). The best of three attempts was recorded.

### Ultrasound measurements

A high-resolution ultrasound system with a 10-MHz transducer (Vingmed System Five; GE Medical Systems, Waukesha, WI) was used to measure brachial artery diameter (11). Each subject was in supine position with the left arm supported on a foam block and a cuff placed on the upper arm. The probe was fixed in an adjustable swivel arm to maintain an identical position on the forearm during the experiments. The brachial artery was scanned in a longitudinal section proximal to its bifurcation, which was used as an anatomical marker, and the diameter was measured at end-diastole. All measurements were performed by the same experienced operator.

Baseline vessel wall diameter was assessed as the mean of three consecutive readings. The cuff on the upper arm was inflated to suprasystolic pressure (250 mmHg) for 4.5 min and then released. Vessel diameter was measured every 30 s for the following 2 min. After a resting period of 15 min, baseline measurements were repeated and a single sublingual dose of 0.8 mg ni-

troglycerin (GTN) was administered. Measurements of vessel diameter were performed 5 min after GTN application.

Flow-mediated dilation of the brachial artery was expressed as percentage change of diameter following reactive hyperemia (mean of four measurements) from baseline. Endothelial-independent dilation to GTN was expressed as percentage change of diameter following drug administration (mean of four measurements) from baseline.

### Ocular fundus pulsation amplitude

Pulse synchronous pulsations of the eye fundus as a measure of choroidal blood

flow were assessed by laser interferometry (15). Briefly, the right eye was illuminated by the beam of a single-mode laser along the optical axis. The light was reflected at both the front side of the cornea and the retina. The two re-emitted waves produced interference fringes from which the distance changes between cornea and retina during a cardiac cycle were calculated. The method has been shown to detect changes in the pulsatile choroidal blood flow with high sensitivity and high topographical resolution (16). Fundus pulsation amplitude was calculated as the mean of three to five cardiac cycles.

Measurements of fundus pulsation

**Table 2—Outcome variables in the diabetic control group**

|                                                                 | Baseline    | 4 months    |
|-----------------------------------------------------------------|-------------|-------------|
| Body weight (kg)                                                | 84 ± 2      | 86 ± 2      |
| BMI (kg/m <sup>2</sup> )                                        | 26.7 ± 1.4  | 27.4 ± 1.4  |
| Mean arterial blood pressure (mmHg)                             | 80 ± 3      | 85 ± 2      |
| Resting heart rate (beats/min)                                  | 76 ± 3      | 78 ± 4      |
| VO <sub>2max</sub> (ml · kg <sup>-1</sup> · min <sup>-1</sup> ) | 29.6 ± 2.3  | 29.7 ± 2.4  |
| Maximum exercise capacity (W)                                   | 207 ± 16    | 204 ± 16    |
| Total cholesterol (mmol/l)                                      | 5.1 ± 0.4   | 5.0 ± 0.4   |
| LDL cholesterol (mmol/l)                                        | 3.1 ± 0.4   | 2.9 ± 0.3   |
| HDL cholesterol (mmol/l)                                        | 1.8 ± 0.3   | 1.6 ± 0.1   |
| Triglycerides (mmol/l)                                          | 0.8 ± 0.1   | 1.0 ± 0.2   |
| HbA <sub>1c</sub> (%)                                           | 7.4 ± 0.4   | 7.4 ± 0.2   |
| Insulin dose (units · kg <sup>-1</sup> · day <sup>-1</sup> )    | 0.66 ± 0.10 | 0.64 ± 0.10 |
| FMD (%)                                                         | 9.8 ± 1.1   | 9.1 ± 1.4   |
| GTN-induced dilation (%)                                        | 10.1 ± 1.2  | 8.9 ± 1.1   |
| FPA reduction by L-NMMA (%)                                     | -12.9 ± 2.3 | -12.3 ± 2.1 |

Results are means ± SE; *n* = 8.

**Table 3—Isometric muscle strength of legs (newton meter) and hands (kilopond) before and after training**

|                  | Before training | Training period |              |
|------------------|-----------------|-----------------|--------------|
|                  |                 | 2 months        | 4 months     |
| <i>n</i>         | 18              | 18              | 15           |
| Left leg         |                 |                 |              |
| Extensors        | 165.3 ± 16.4    | 166.9 ± 14.1    | 175.4 ± 13.0 |
| Flexors          | 95.7 ± 9.5      | 90.6 ± 7.3      | 99.2 ± 8.9   |
| Right leg        |                 |                 |              |
| Extensors        | 178.9 ± 18.2    | 182.4 ± 16.2    | 193.1 ± 16.5 |
| Flexors          | 102.7 ± 8.3     | 96.6 ± 8.0      | 102.5 ± 8.6  |
| Dominant hand    | 60.4 ± 5.9      | 59.0 ± 6.3      | 64.6 ± 5.6   |
| Nondominant hand | 56.3 ± 5.3      | 55.2 ± 5.8      | 60.6 ± 5.9   |

Results are presented as means ± SE. No differences were noted after 2 and 4 months of training.

amplitude were performed with subjects in sitting position after a 15-min equilibration period. A bolus of 5 mg/kg L-NMMA (Clinalfa, Läufelfingen, Switzerland) was then administered intravenously, and measurements were repeated 15 and 30 min after start of bolus administration. The maximum effect on fundus pulsation amplitude (FPA) was used for statistical analysis.

### Training program

Patients were assigned to groups of four to five patients, who participated in a 4-month training program of stationary cycling. Each exercise session lasted for ~1 h. At each training session, cycling workload was slowly increased on an individual basis. Following a 3- to 5-min warm-up, resistance was increased until a heart rate of 60–70% of the previously established difference from resting to maximum heart rate was achieved. This workload was maintained over 40 min, followed by a 5-min cool-down. During the first 2 weeks, training was carried out twice a week, and during the remaining study period, three times a week. The training was guided and supervised by a physician. The patients were allowed to carry out an additional training program at home, but compliance to training sessions had to be >60% for eligibility.

### Statistical analysis

All data sets were tested for normal distribution using the Kolmogorov-Smirnov test. Baseline measurements were compared between groups using unpaired Student's *t* test or the Mann-Whitney *U* test for normally and nonnormally distributed variables, respectively. Within

groups, variables were tested by the paired Student's *t* test or the Wilcoxon signed-rank test, respectively. All calculations were performed using the Statistica software package (release 4.5; StatSoft, Tulsa, OK). *P* < 0.05 was considered significant. Values are expressed as means ± SE unless indicated otherwise.

**RESULTS**— Figure 1 summarizes patients in the study. Eighteen patients with type 1 diabetes completed training over 2 months, and 15 patients were eligible for analysis after 4 months. Three patients discontinued the study after 2 months of training because of time constraints. Exercise session attendance (compliance) was 81 ± 7%. All eight control patients with type 1 diabetes completed the 4-month study period. Thirteen patients of the training group repeated assessment of outcome parameters 8 months after the end of the training program. None of these patients continued regular training. Two patients discontinued the study for personal reasons.

### Effects of training on physical and biochemical parameters

The hemodynamic and metabolic parameters from baseline, after 2 and 4 months of aerobic exercise, and 8 months after training are presented in Table 1.  $\text{Vo}_{2\text{max}}$  increased by 13.4 ± 8.0% after 2 months and by 27.3 ± 12.9% after 4 months of training (*P* = 0.04). Exercise capacity was increased and resting heart rate was decreased with training, but these changes did not reach the level of significance. Isometric muscle strength of both legs tended to increase with training (Table 3). Cholesterol tended to decrease, and a significant reduction of insulin requirement

by 18% was observed in the training group after 4 months (*P* < 0.05). The significant effect of training on  $\text{Vo}_{2\text{max}}$ , exercise capacity and resting heart rate, and insulin requirement were abolished 8 months after the end of the training program, when the values were comparable to those before lifestyle intervention.

Maximum exercise capacity of control subjects was higher than that of the training group before exercise sessions, reflecting their good physical condition. Physical and metabolic conditions were unchanged in control subjects after 4 months (Table 2).

### Conduit artery function

Brachial artery diameter was 4.0 ± 0.7 mm before training, 4.0 ± 0.6 mm after 2 months, and 4.0 ± 0.6 mm after 4 months of training (NS). The arterial diameters of the control group were 4.1 ± 0.6 mm and 3.9 ± 0.5 mm at baseline and after 4 months, respectively (NS). The endothelium-dependent vasodilatory response to reactive hyperemia (flow-mediated dilation [FMD]) was only slightly improved after 2 months, but it significantly increased after 4 months of training (*P* = 0.04) (Fig. 2). Endothelium-independent dilation to GTN also tended to increase with training (Fig. 2). FMD and endothelium-independent dilation returned to baseline values 8 months after training (Table 4).

FMD tended to be higher in the control group (*P* = 0.08 vs. training group). No changes in FMD or GTN-induced vasodilation were detectable in the control group during the 4-month observation period.

### Resistance vessel responsiveness

Baseline FPA was 4.3 ± 0.3 μm before training and did not change after 2 months (4.2 ± 0.3 μm) or 4 months (4.4 ± 0.3 μm) of exercise. Before training, L-NMMA reduced FPA to a maximum of 4.0 ± 0.3 μm (*P* < 0.0001) (Fig. 3). This responsiveness was significantly enhanced by regular exercise, and a reduction of FPA to a maximum of 3.7 ± 0.3 μm and 3.8 ± 0.3 μm with L-NMMA was seen after 2 and 4 months, respectively (*P* < 0.05 vs. pretraining; NS between 2 and 4 months) (Fig. 3). FPA responsiveness correlated with  $\text{Vo}_{2\text{max}}$  after 4 months of training (*r* = 0.54; *P* < 0.05). Again, the effect of training on FPA was no longer apparent 8 months after training, and baseline responsiveness had been re-established (Table 4).



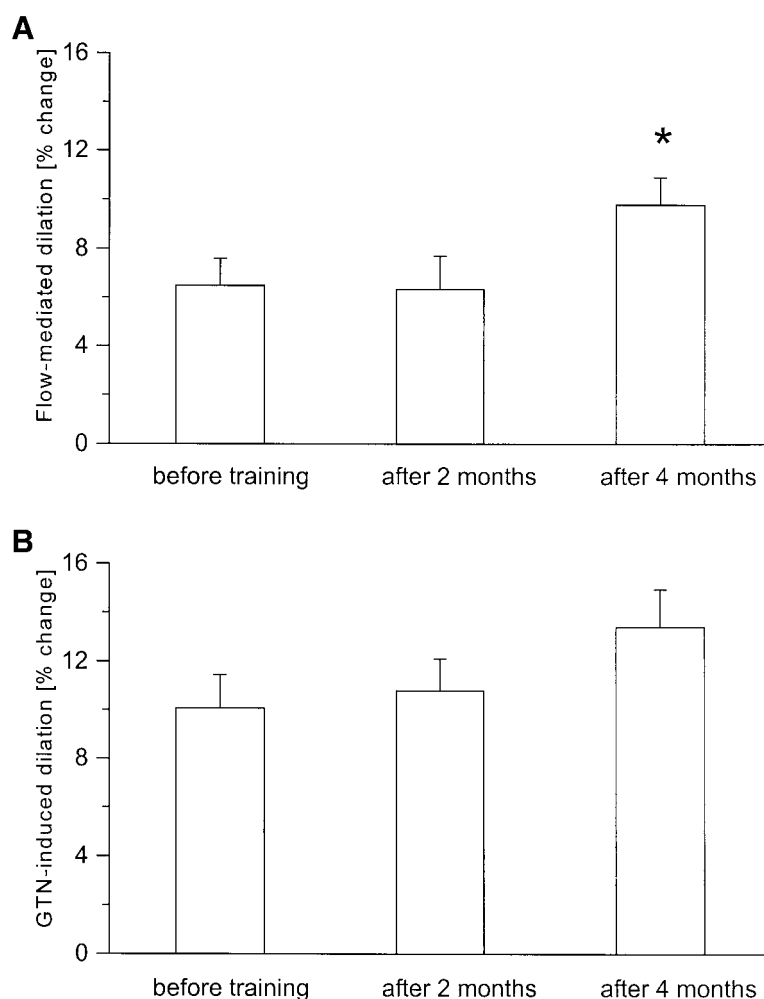

**Figure 2**—Flow-mediated (A) and GTN-induced (B) dilation of the brachial artery before training ( $n = 18$ ) and after 2 ( $n = 18$ ) and 4 ( $n = 15$ ) months of training in patients with diabetes. Vasodilation is expressed as percent change from baseline diameter; results are means  $\pm$  SE. Exercise significantly increased flow-mediated vasodilation,  $*P < 0.05$  (ANOVA) vs. before training.

FPA in the control group was  $4.4 \pm 0.5 \mu\text{m}$  before and  $4.5 \pm 0.4 \mu\text{m}$  after 4 months. The reduction of FPA by L-NMMA to  $3.9 \pm 0.5 \mu\text{m}$  was greater than in the training group, but the difference did not reach the level of significance ( $P = 0.1$ ). The responsiveness of FPA to L-NMMA was unchanged in control subjects after 4 months (Table 2).

**CONCLUSIONS**— The present study demonstrates that endothelial function of conduit and resistance vessels can be improved by regular aerobic training in patients with type 1 diabetes, and the study has important implications for these patients. First, this effect was shown in different vascular beds including the ocular vasculature, which is a target of diabetic vascular damage. Second, there is

also evidence, for the first time, that the beneficial effects of training on different vascular beds are not maintained 8 months after discontinuation of a regular training program.

Endothelial dysfunction is associated with arteriosclerosis and is regarded as a risk factor for cardiovascular events (17). Im-

provement of endothelial function is therefore an important goal in patients with type 1 diabetes, since these patients have a two- to fourfold risk of developing cardiovascular disease (18). FMD has been used to investigate the presence of endothelial dysfunction in type 1 diabetes, which was also seen in this study cohort (19). After 4 months of training, significant changes in FMD of the brachial artery were seen in our experiments and paralleled by a small increase in endothelium-independent vasodilation. Our results and the magnitude of effect on conduit artery function are in good agreement with other training studies in different patient cohorts (10,20). It has further been demonstrated that the dilating capacity to nitrates is also enhanced in trained men (21). Thus, it is possible that high-intensity training could also increase NO sensitivity.

There is no direct evidence of which mechanisms contribute to the functional improvement of the vasculature in our study. Most authors have discussed the role of increased shear stress, which affects the vascular NO system in many ways (22). Endothelial L-arginine uptake, the substrate of NO production, is increased (23); further, NO synthase gene expression in endothelial cells is augmented (24) and NO release of endothelial cells is increased (25). In animals, enhanced NO synthase gene expression, higher NO production, and increased endothelium-dependent dilation of coronary arteries were associated with training (26). Inactivation of NO by oxygen-derived free radicals is an important mechanism of endothelial dysfunction in diabetes (27). Hyperglycemia can promote superoxide production as a consequence of glucose auto-oxidation, formation of advanced glycation end products, and abnormal arachidonic acid metabolism by activating protein kinase C, depleting tetrahydrobiopterin, and increasing the activity of nitric oxide syn-

**Table 4**—Vascular function parameters of 13 patients with type 1 diabetes before training, after 4 months of training, and after 8 months without training

|                             | Before training | 4 months of training | 8 months after training |
|-----------------------------|-----------------|----------------------|-------------------------|
| FMD (%)                     | $7.7 \pm 1.4$   | $9.9 \pm 1.0^*$      | $7.3 \pm 0.4$           |
| GTN-induced dilation (%)    | $10.4 \pm 1.5$  | $14.1 \pm 1.5$       | $10.1 \pm 0.7$          |
| FPA reduction by L-NMMA (%) | $-9.5 \pm 1.0$  | $-13.4 \pm 1.4^*$    | $-10.9 \pm 1.2$         |

Results are means  $\pm$  SE;  $n = 13$ .  $*P < 0.05$  vs. before training.

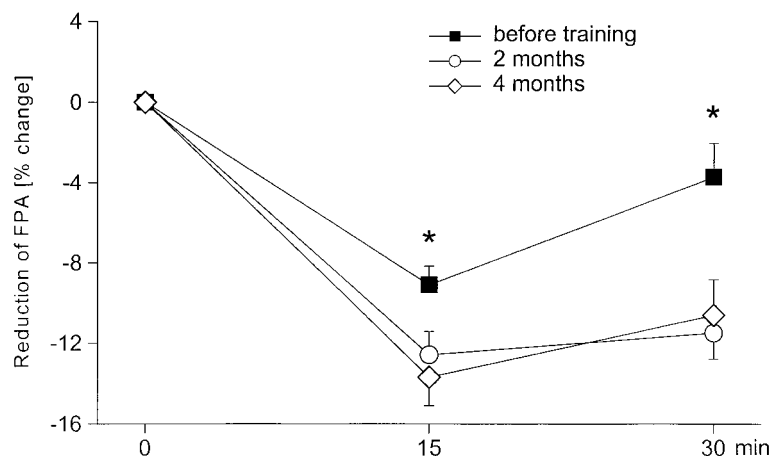

**Figure 3**—Effect of L-NMMA on ocular fundus pulsation amplitude before training (n = 18) and after 2 (n = 18) and 4 (n = 15) months of training in patients with diabetes. Results are means  $\pm$  SE. Exercise significantly increased the vasoconstrictor response of choroidal resistance arteries, \*P < 0.05 (ANOVA) vs. 2 and 4 months.

thase, which could also be a source of superoxide (28). Training could have increased the antioxidative capacity by increased expression of the potent antioxidative extracellular enzyme superoxide dismutase, as shown in animal studies (29), or indirectly by enhanced NO formation (30).

A role of increased NO synthesis, release of NO, or altered NO sensitivity by training is also supported by our results obtained in the ocular vasculature. NO is an important regulator of ocular blood flow, and the choroidal vasculature is particularly sensitive to changes in NO production (31). We have previously demonstrated that the ocular responsiveness to L-NMMA is reduced in patients with long-standing type 1 diabetes (12), which is compatible with the results of the present study. Maximum effects of training on L-NMMA responsiveness in the ocular vasculature were already seen after 2 months. It is unclear if the effect of exercise on resistance arteries is present before changes in conduit arteries are detectable or if this is due to the different methodology or a higher sensitivity of pharmacological testing. Nevertheless, our results in the ocular vasculature are important, since diabetic ocular angiopathy is associated with altered ocular blood flow (32).

The training group had a small reduction in total and LDL cholesterol levels; reduction of LDL cholesterol is also associated with improved endothelial function (33). It is possible that reduction of

cholesterol could have contributed to improvement of vascular function in this group. Daily insulin requirement was also reduced. This finding is in good agreement with former exercise studies in patients with type 1 diabetes (34). Experimental studies demonstrated exercise-increased expression and function of several proteins involved in insulin-signal transduction (35). Insulin resistance has been linked to impaired endothelial function (36). Therefore, improvement of glucose metabolism and insulin utilization could have influenced vascular function in our patients. However, no clamp investigations were performed, and previous studies found no connection between reduced insulin requirements and insulin resistance (34).

Regardless of the underlying mechanism, the beneficial effect of training is independent of blood glucose level and apparently not limited to the muscle group under training, since bicycle training improved endothelial function in the brachial artery and in the eye. The observation that vascular function can be improved by up to 50% in type 1 diabetic patients implies that regular exercise is beneficial even at a later time point of diabetes, because potent effects may still be achieved. Importantly, the impact of training was independent of patient age or presence of microvascular complications. However, the beneficial effects of training are limited to the period of regular exercise, and the functional improvement does not persist.

One limitation of our study is that we did not follow a randomized design. It was not possible to recruit an appropriate number of sedentary patients with long-standing type 1 diabetes who were willing to comply with the training protocol for randomization, and control subjects were therefore slightly more trained. However, the FBF and FPA measurements are robust against a potential observer bias.

In conclusion, our data show that physical training significantly improves vascular function in patients with long-standing type 1 diabetes, who are at considerable risk for developing micro- and macroangiopathy. Whether improved endothelial function can reduce cardiovascular morbidity and mortality in these patients remains to be established. Further studies with continued training programs and hard clinical end points are required to answer this question.

**Acknowledgments**—The experiments were supported by a grant from the “Jubiläumsfonds der Oesterreichischen Nationalbank.”

We are grateful for the assistance of Monika Knötig during muscle strength tests and to Christian Böhm from GE Austria for providing us with a System Five ultrasound system.

## References

- Jacobs J, Sena M, Fox N: The cost of hospitalization for the late complications of diabetes in the United States. *Diabet Med* 8:S23–S29, 1991
- Andersen AR, Christiansen JS, Andersen JK, Kreiner S, Deckert T: Diabetic nephropathy in type 1 (insulin dependent) diabetes: an epidemiological study. *Diabetologia* 25:496–501, 1983
- Creager MA, Cooke JP, Mendelsohn ME, Gallagher SJ, Coleman SM, Loscalzo J, Dzau VJ: Impaired vasodilation of forearm resistance vessels in hypercholesterolemic humans. *J Clin Invest* 86:228–234, 1990
- Cardillo C, Kilcoyne CM, Quyyumi AA, Cannon RO 3rd, Panza JA: Selective defect in nitric oxide synthesis may explain the impaired endothelium-dependent vasodilation in patients with essential hypertension. *Circulation* 97:851–856, 1998
- Calver A, Collier J, Vallance P: Inhibition and stimulation of nitric oxide synthesis in the human forearm arterial bed of patients with insulin-dependent diabetes. *J Clin Invest* 90:2548–2554, 1992
- John S, Schmieder RE: Impaired endothelial function in arterial hypertension and hypercholesterolemia: potential mechanisms and differences. *J Hypertens* 18:363–374, 2000

7. Schachinger V, Britten MB, Zeiher AM: Prognostic impact of coronary vasodilator dysfunction on adverse long-term outcome of coronary heart disease. *Circulation* 101:1899–1906, 2000
8. Hambrecht R, Fiehn E, Weigl C, Gielen S, Hamann C, Kaiser R, Yu J, Adams V, Niebauer J, Schuler G: Regular physical exercise corrects endothelial dysfunction and improves exercise capacity in patients with chronic heart failure. *Circulation* 98: 2709–2715, 1998
9. Lewis TV, Dart AM, Chin-Dusting JP, Kingwell BA: Exercise training increases basal nitric oxide production from the forearm in hypercholesterolemic patients. *Arterioscler Thromb Vasc Biol* 19:2782–2787, 1999
10. Lavrencic A, Salobir BG, Keber I: Physical training improves flow-mediated dilation in patients with the polymetabolic syndrome. *Arterioscler Thromb Vasc Biol* 20: 551–555, 2000
11. Celermajer DS, Sorensen KE, Gooch VM, Spiegelhalter DJ, Miller OI, Sullivan ID, Lloyd JK, Deanfield JE: Non-invasive detection of endothelial dysfunction in children and adults at risk of atherosclerosis. *Lancet* 340:1111–1115, 1992
12. Schmetterer L, Findl O, Fasching P, Ferber W, Strenn K, Breiteneder H, Adam H, Eichler HG, Wolzt M: Nitric oxide and ocular blood flow in patients with IDDM. *Diabetes* 46:653–658, 1997
13. Early Treatment Diabetic Retinopathy Study Research Group: Grading diabetic retinopathy from stereoscopic color fundus photographs: an extension of the modified Airlie House classification. ETDRS report number 10. *Ophthalmology* 98:786–806, 1991
14. Wiesinger GF, Quittan M, Nuhr M, Volc-Platzer B, Ebenbichler G, Zehetgruber M, Graninger W: Aerobic capacity in adult dermatomyositis/polymyositis patients and healthy controls. *Arch Phys Med Rehabil* 81:1–5, 2000
15. Riva CE, Petrig BL: Choroidal blood flow by laser Doppler flowmetry. *Opt Eng* 34: 746–752, 1995
16. Schmetterer L, Dallinger S, Findl O, Strenn K, Graselli U, Eichler HG, Wolzt M: Noninvasive investigations of the normal ocular circulation in humans. *Invest Ophthalmol Vis Sci* 39:1210–1220, 1998
17. Suwaidi JA, Hamasaki S, Higano ST, Nishimura RA, Holmes DR Jr, Lerman A: Long-term follow-up of patients with mild coronary artery disease and endothelial dysfunction. *Circulation* 101:948–954, 2000
18. Borch-Johnsen K, Kreiner S: Proteinuria: value as predictor of cardiovascular mortality in insulin dependent diabetes mellitus. *Br Med J* 294:1651–1654, 1987
19. Haskell WL, Sims C, Myll J, Bortz WM, St Goar FG, Alderman EL: Coronary artery size and dilating capacity in ultradistance runners. *Circulation* 87:1076–1082, 1993
20. Dogra G, Rich L, Stanton K, Watts GF: Endothelium-dependent and -independent vasodilation studied at normoglycaemia in type I diabetes mellitus with and without microalbuminuria. *Diabetologia* 44:593–601, 2001
21. Hambrecht R, Wolf A, Gielen S, Linke A, Hofer J, Erbs S, Schoene N, Schuler G: Effect of exercise on coronary endothelial function in patients with coronary artery disease. *N Engl J Med* 342:454–460, 2000
22. Gielen S, Schuler G, Hambrecht R: Exercise training in coronary artery disease and coronary vasomotion. *Circulation* 103:E1–E6, 2001
23. Posch K, Schmidt K, Graier WF: Selective stimulation of L-arginine uptake contributes to shear stress-induced formation of nitric oxide. *Life Sci* 64:663–670, 1999
24. Uematsu M, Ohara Y, Navas J, Nishida K, Murphy TJ, Alexander RW, Nerem RM, Harrison DG: Regulation of endothelial cell nitric oxide synthase mRNA expression by shear stress. *Am J Physiol* 269: C1371–C1378, 1995
25. Hutcheson IR, Griffith TM: Release of endothelium-derived relaxing factor is modulated both by frequency and amplitude of pulsatile flow. *Am J Physiol* 261:H257–H262, 1991
26. Wang J, Wolin MS, Hintze TH: Chronic exercise enhances endothelium-mediated dilation of epicardial coronary artery in conscious dogs. *Circ Res* 73:829–838, 1993
27. Timimi FK, Ting HH, Haley EA, Roddy MA, Ganz P, Creager MA: Vitamin C improves endothelium-dependent vasodilation in patients with insulin-dependent diabetes mellitus. *J Am Coll Cardiol* 31: 552–557, 1998
28. Beckman JA, Goldfine AB, Gordon MB, Creager MA: Ascorbate restores endothelium-dependent vasodilation impaired by acute hyperglycemia in humans. *Circulation* 103:1618–1623, 2001
29. Fukai T, Siegfried MR, Ushio-Fukai M, Cheng Y, Kojda G, Harrison DG: Regulation of the vascular extracellular superoxide dismutase by nitric oxide and exercise training. *J Clin Invest* 105:1631–1639, 2000
30. Landmesser U, Merten R, Spiekermann S, Buttner K, Drexler H, Hornig B: Vascular extracellular superoxide dismutase activity in patients with coronary artery disease: relation to endothelium-dependent vasodilation. *Circulation* 101:2264–2270, 2000
31. Mayer BX, Mensik C, Krishnaswami S, Drendorf H, Eichler HG, Schmetterer L, Wolzt M: Pharmacokinetic-pharmacodynamic profile of systemic nitric oxide-synthase inhibition with L-NMMA in humans. *Br J Clin Pharmacol* 47:539–544, 1999
32. Schmetterer L, Wolzt M: Ocular blood flow and associated functional deviations in diabetic retinopathy. *Diabetologia* 42: 387–405, 1999
33. Dupuis J, Tardif JC, Cernacek P, Theroux P: Cholesterol reduction rapidly improves endothelial function after acute coronary syndromes. The RECIFE (reduction of cholesterol in ischemia and function of the endothelium) trial. *Circulation* 99:3227–3233, 1999
34. Ebeling P, Tuominen JA, Bourey R, Koranyi L, Koivisto VA: Athletes with IDDM exhibit impaired metabolic control and increased lipid utilization with no increase in insulin sensitivity. *Diabetes* 44: 471–477, 1995
35. Chibalin AV, Yu M, Ryder JW, Song XM, Galuska D, Krook A, Wallberg-Henriksson H, Zierath JR: Exercise-induced changes in expression and activity of proteins involved in insulin signal transduction in skeletal muscle: differential effects on insulin-receptor substrates 1 and 2. *Proc Natl Acad Sci U S A* 97:38–43, 2000
36. Laakso M, Edelman SV, Brechtel G, Baron AD: Decreased effect of insulin to stimulate skeletal muscle blood flow in obese man: a novel mechanism for insulin resistance. *J Clin Invest* 85:1844–1852, 1990
